# Supplementary material
Source: publisher figshare collection journal article supplement (https://gsajournals.figshare.com/ndownloader/files/25186160)
Supplement: Supplementary file 1 [file 25186160]

## Supplemental Material

### The master regulator MAT1-1-1 of fungal mating binds to its targets via a conserved motif in the human pathogen *Aspergillus fumigatus*

Barbara Ramšak\*, Jessica Markau\*, Tobias Pazen<sup>†</sup>, Tim A. Dahlmann\*, Sven Krappmann<sup>†</sup>, Ulrich Kück\*<sup>1</sup>

\*Allgemeine und Molekulare Botanik, Ruhr-Universität Bochum, 44780 Bochum, Germany

<sup>†</sup> Mikrobiologisches Institut – Klinische Mikrobiologie, Immunologie und Hygiene, Universitätsklinikum Erlangen und Friedrich-Alexander-Universität (FAU) Erlangen-Nürnberg, 91054 Erlangen, Germany

#### <sup>1</sup> Corresponding author:

Ulrich Kück

E-mail: ulrich.kueck@rub.de

## **Supplemental files:**

### **File S1. Protein synthesis in *E. coli*.**

*E. coli* cells were grown in 2-YT liquid-medium (1.6% Tryptone, 0.5% NaCl, 1% yeast extract, pH 7.0) containing 35 µg/ml chloramphenicol and 100 µg/ml ampicillin at 37°C. When the cells reached an optical density of  $A_{600} = 0.6$ , the temperature was lowered to 20°C and protein expression was induced using 0.5 mM  $\beta$ -D-1-thiogalactopyranoside (IPTG). Induced cultures were then incubated an additional 6 h at 20°C. Following incubation, cells were harvested and cell pellets were stored at -70°C until further use. For the cell lysate preparation, we resuspended cells in ice-cold phosphate buffered saline (PBS) buffer (10 mM  $\text{Na}_2\text{HPO}_4$ , 18 mM  $\text{KH}_2\text{PO}_4$ , 140 mM NaCl, 27 mM KCl) containing 5 mM DTT, 0.1 % Protease Inhibitor Cocktail IV (MiliporeSigma, Burlington, Massachusetts) and 1 mM phenylmethylsulfonyl fluoride (PMSF). Cells were then disrupted by 3 rounds of sonification pulses (10% amplitude) for 30 seconds with a pause interval of 30 seconds on ice. Cell lysates were cleared by centrifugation, and 6 µl of clarified lysate from each protein, mixed with 2x Laemmli buffer, were separated by 10% SDS-polyacrylamide gel electrophoresis (SDS-PAGE). Protein expression was analyzed by western blotting.

**File S2. High-yield purification of the recombinant AfMAT1-1-1<sub>78-235</sub>.**

For high-yield purification of GST-AfMAT1-1-1<sub>78-235</sub>, cleared lysates were prepared from 2 l of induced bacteria using lysis buffer (10 ml of buffer/gram cells) (500 mM NaCl, 27 mM KCl, 10 mM Na<sub>2</sub>HPO<sub>4</sub>, 18 mM KH<sub>2</sub>PO<sub>4</sub>) containing 5 mM DTT, 0.1% Protease Inhibitor Cocktail IV (MiliporeSigma, Burlington, Massachusetts) and 1 mM PMSF. Prior to cell disruption, 5 mg of DNase I (Sigma-Aldrich, St. Louis, Missouri) was added per 100 ml of cell suspension and the mixture was then disrupted with a microfluidizer M-100L (Microfluidics) at 13,000 psi while constantly cooling on ice. The cell suspension was centrifuged at 4°C to remove cell debris. The supernatant was filtered through a 0.22 µm filter and loaded onto a pre-equilibrated 20 ml GSTrap™ (GE Healthcare, Chicago, Illinois) glutathione agarose column. Unbound material was washed with the lysis buffer in the absence of protease inhibitors. Proteins were subsequently eluted using a glutathione elution buffer (50 mM Tris, 500 mM NaCl, 5 mM DTT, 20 mM L-glutathione reduced). Fractions of unbound proteins (washing step) and fractions containing the protein (elution step), were collected and analysed by 10% SDS-PAGE. Elution fractions with the highest protein amount were pooled together and concentrated using Amicon® Ultra centrifugal filter with a 10,000 Da molecular weight cut-off (MWCO). The GST-tag and AfMAT1-1-1<sub>78-235</sub> were separated overnight by TEV digestion using a protein to enzyme ratio of 50:1 (w:w), while dialyzing against dialysis buffer (50 mM HEPES [pH 7.5], 500 mM NaCl, 1 mM EDTA, 2 mM DTT) in a 6,000 – 8,000 Da (MWCO) tubing (Thermo Fisher Scientific, Waltham, Massachusetts). Next, GST-tag and GST-tagged TEV protease were removed using Glutathione Sepharose (GE Healthcare, Chicago, Illinois) beads. Finally, size-exclusion chromatography was performed using a Hiloal™ 16/60 Superdex™ 75 pg column (GE Healthcare, Chicago, Illinois) in the dialysis buffer.

**File S3. Protein quantification and western blotting.**

The concentration of purified proteins was determined using the Bradford assay. Protein samples were boiled in 2x Laemmli buffer for 5 min before SDS-PAGE, then gels were equilibrated in blocking buffer (25 mM Tris, 190 mM Glycine and 0.1% SDS (w/v)) before western blotting onto PVDF membranes (GE Healthcare, Chicago, Illinois). Non-specific binding was prevented by incubating membranes in PBST blocking buffer (80 mM  $\text{Na}_2\text{HPO}_4$ , 21 mM  $\text{NaH}_2\text{PO}_4$ , 100 mM NaCl (pH 7.5), 0.1% Tween 20 (v/v)), containing 5% dried milk powder, for 1 h at room temperature, and proteins were detected using a 1:5000 dilution of an anti-GST HRP conjugate (RPN1236V) (GE Healthcare, Chicago, Illinois) in PBST buffer for 1 h at room temperature. Proteins were visualized using ChemiDoc XRS+ Imaging System (Bio-Rad, Hercules, California).

## Supplemental tables:

**Table S1.** List of oligonucleotides used in this study. Oligonucleotide specificity and orientation are given (f: forward; r: reverse). The AfMAT1-1-1 binding motifs are underlined and the chromosomal positions of the oligonucleotides carrying corresponding binding motif are indicated.

| Oligonucleotide                             | Sequence (5' to 3')                          | Specificity                                                                                                     |
|---------------------------------------------|----------------------------------------------|-----------------------------------------------------------------------------------------------------------------|
| <b>Plasmids construction and sequencing</b> |                                              |                                                                                                                 |
| AfMAT1-1_f                                  | ATATACCATGGAAGCTGCAATCTC<br>TCC              | <i>A. fumigatus</i> MAT1-1-1 gene; used for vectors pGEX-AfMAT1-1-1_F1, -F4, -F6; <i>Nco</i> I restriction site |
| AfMAT1-1_r                                  | ATATAGAATTCTCAGACGTTGATG<br>TATTGATCAATGTC   | <i>A. fumigatus</i> MAT1-1-1 gene; used for vectors pGEX-AfMAT1-1-1_F3; <i>Eco</i> RI restriction site          |
| AfMAT1-1_F4_r                               | ATATAGAATTCTCACATTGTGGAA<br>GTATTGTTGCCATTAC | <i>A. fumigatus</i> MAT1-1-1 gene; used for vectors pGEX-AfMAT1-1-1_F4, -F5; <i>Eco</i> RI restriction site     |
| AfMAT1-1_F6_r                               | ATATAGAATTCTCAAGTGATCTGA<br>ATGCCGTTCTC      | <i>A. fumigatus</i> MAT1-1-1 gene; used for vectors pGEX-AfMAT1-1-1_F6, -F7; <i>Eco</i> RI restriction site     |
| AfMAT1-1_d_f                                | ATATACCATGGCCAAACGCACCCA<br>G                | <i>A. fumigatus</i> MAT1-1-1 gene; used for vectors pGEX-AfMAT1-1-1_F2, -F3, -F5; <i>Nco</i> I restriction site |
| AfMAT1-1_d_r                                | ATATAGAATTCTCAATCGGCTTCA<br>GGAATTGTCTG      | <i>A. fumigatus</i> MAT1-1-1 gene; used for vectors pGEX-AfMAT1-1-1_F1, -F2; <i>Eco</i> RI restriction site     |
| pGex_f                                      | ATAGCATGGCCTTTGCAG                           | pGEX-4T-1-TEV backbone; used for sequencing                                                                     |
| pGex_r                                      | GAGCTGCATGTGTCAGAG                           | pGEX-4T-1-TEV backbone; used for sequencing                                                                     |
| <b>qRT-PCR</b>                              |                                              |                                                                                                                 |
| ES077                                       | ACACATTACGCCGTGGTGCC                         | <i>ppgA</i>                                                                                                     |
| ES078                                       | ATCGGCAGAGCGCTTCACCT                         | <i>ppgA</i>                                                                                                     |
| TP033                                       | AACGTCATTTGCGTTGGTGC                         | <i>tomA</i>                                                                                                     |
| TP034                                       | TTCTTGGAGTTCGGTGCTTCG                        | <i>tomA</i>                                                                                                     |
| TP039                                       | TCGTTGCCCGATAGTCCTAC                         | <i>cp9</i>                                                                                                      |
| TP040                                       | CCCATTGCCTGTCATCAACC                         | <i>cp9</i>                                                                                                      |
| TP043                                       | AACAATCAGGCGTGGGATGA                         | <i>AFUB_070880</i>                                                                                              |
| TP044                                       | CGCATTGGGAATTGGGATGG                         | <i>AFUB_070880</i>                                                                                              |

| EMSA        |                                    |                                                                |
|-------------|------------------------------------|----------------------------------------------------------------|
| tom1-2_f    | TCACGTGATCTCTATTGAGAACAA<br>TAGAA  | chr2:3627755-3627783                                           |
| tom1-2_r    | CTTCTATTGTTCTCAATAGAGATCA<br>CGTG  |                                                                |
| ppg1-2_f    | CAGTTCTCAATAGGAATCTTATTG<br>ACCGA  | chr1:278174-278202                                             |
| ppg1-2_r    | CGATGGAATGAATGAGTTTATTAT<br>TGATC  |                                                                |
| pre1-2_f    | AGATCAATAATAAACTCATTCAATC<br>CATC  | chr1:3250686-3250714                                           |
| pre1-2_r    | CGATGGAATGAATGAGTTTATTAT<br>TGATC  |                                                                |
| tomA-1_f    | TCCTATTCTGCCTATTGATGGGAA<br>AGAAC  | chr4:1566229-1566257                                           |
| tomA-1_r    | TGTTCTTTCCCATCAATAGGCAGA<br>ATAGG  |                                                                |
| tomA-2_f    | AACAATACCAACTCAATAAGGAGG<br>CCGGG  | chr4:1566283-1566256                                           |
| tomA-2_r    | CCCCGGCCTCCTTATTGAGTTGGT<br>ATTGT  |                                                                |
| ppgA-1_f    | AAGGCTACCTCTTATTGAGAAGGT<br>GATT   | chr6:1366658-1366630                                           |
| ppgA-1_r    | AAAATCACCTTCTCAATAAGAGGT<br>AGCCT  |                                                                |
| ppgA-2_f    | TAAAAATGTGGATCAATAACACAA<br>AGGCT  | chr6:1366652-1366680                                           |
| ppgA-2_r    | TAGCCTTTGTGTTATTGATCCACAT<br>TTTT  |                                                                |
| preA-1_f    | AAACAGCGGGCTTATTGACACCCA<br>GAAAG  | chr5:1975777-1975805                                           |
| preA-1_r    | CCTTTCTGGGTGTCAATAAGCCCG<br>CTGATT |                                                                |
| preA-2_f    | AAGTCGATCTTCTCAATAGTCAGG<br>TGATG  | chr5:1975984-1975920                                           |
| preA-2_r    | TCATCACCTGACTATTGAGAAGAT<br>CGACT  |                                                                |
| preA-3_f    | CATGGATGCAATCATTGACTGAAT<br>TACTT  | chr5:1975999-1976027                                           |
| preA-3_r    | CAAGTAATTCAGTCAATGATTGCA<br>TCCAT  |                                                                |
| tomA-1_m1_f | TCCTATTCTGCCTgTTGATGGGAA<br>AGAAC  | chr4:1566229-1566257; A → G at<br>1566242                      |
| tomA-1_m1_r | TGTTCTTTCCCATCAACAGGCAGA<br>ATAGG  |                                                                |
| tomA-1_m2_f | TCCTATTCTGCCTgTTaATGGGAAA<br>GAAC  | chr4:1566229-1566257; A → G at<br>1566242 and G → A at 1566245 |

|             |                                            |                                                                |
|-------------|--------------------------------------------|----------------------------------------------------------------|
| tomA-1_m2_r | TGTTCTTTCCCATTAACAGGCAGA<br>ATAGG          |                                                                |
| ppgA-1_m1_f | AAGGCTACCTCTT <u>g</u> TTGAGAAGGT<br>GATTT | chr6:1366658-1366630; A → G at<br>1366645                      |
| ppgA-1_m1_r | AAAATCACCTTCTCAACAAGAGGT<br>AGCCT          |                                                                |
| ppgA-1_m2_f | AAGGCTACCTCTT <u>g</u> TTaAGAAGGT<br>GATTT | chr6:1366658-1366630; A → G at<br>1366645 and G → A at 1366642 |
| ppgA-1_m2_r | AAAATCACCTTCTTAACAAGAGG<br>TAGCCT          |                                                                |

**Table S2.** List of plasmids used in this study.

| Name               | Description                                                                                                                  | Source                      |
|--------------------|------------------------------------------------------------------------------------------------------------------------------|-----------------------------|
| pUC19-AfMAT1-1     | General cloning vector containing <i>MAT1-1-1</i> cDNA (1-1107 bp) from <i>A. fumigatus</i>                                  | Krappmann, unpublished      |
| pGEX-4T-1-TEV      | overexpression of the recombinant proteins in <i>E.coli</i> strain BL21 (DE3) pLysS                                          | Laboratory stock            |
| pGEX-MAT1          | <i>MAT1-1-1</i> cDNA from <i>P. chrysogenum</i> ; overexpression of a full-length GST-MAT1-1-1 (1-342 aa)                    | (Becker <i>et al.</i> 2015) |
| pGEX-AfMAT1-1-1    | <i>MAT1-1-1</i> cDNA (1-1107 bp) from <i>A. fumigatus</i> ; overexpression of a GST-MAT1-1-1 (1-368 aa)                      | This study                  |
| pGEX-AfMAT1-1-1_F1 | <i>MAT1-1-1</i> cDNA (1-591 bp) from <i>A. fumigatus</i> ; overexpression of a GST-MAT1-1-1 <sub>1-197</sub> (1-197 aa)      | This study                  |
| pGEX-AfMAT1-1-1_F2 | <i>MAT1-1-1</i> cDNA (232-591 bp) from <i>A. fumigatus</i> ; overexpression of a GST-MAT1-1-1 <sub>78-197</sub> (78-197 aa)  | This study                  |
| pGEX-AfMAT1-1-1_F3 | <i>MAT1-1-1</i> cDNA (232-1107 bp) from <i>A. fumigatus</i> ; overexpression of a GST-MAT1-1-1 <sub>78-368</sub> (78-368 aa) | This study                  |
| pGEX-AfMAT1-1-1_F4 | <i>MAT1-1-1</i> cDNA (1-705 bp) from <i>A. fumigatus</i> ; overexpression of a GST-MAT1-1-1 <sub>1-235</sub> (1-235 aa)      | This study                  |
| pGEX-AfMAT1-1-1_F5 | <i>MAT1-1-1</i> cDNA (232-705 bp) from <i>A. fumigatus</i> ; overexpression of a GST-MAT1-1-1 <sub>78-235</sub> (78-235 aa)  | This study                  |
| pGEX-AfMAT1-1-1_F6 | <i>MAT1-1-1</i> cDNA (1-762 bp) from <i>A. fumigatus</i> ; overexpression of a GST-MAT1-1-1 <sub>1-254</sub> (1-254 aa)      | This study                  |
| pGEX-AfMAT1-1-1_F7 | <i>MAT1-1-1</i> cDNA (232-762 bp) from <i>A. fumigatus</i> ; overexpression of a GST-MAT1-1-1 <sub>78-254</sub> (78-254 aa)  | This study                  |



**Table S3.** Theoretical molecular weights (MWs) of *A. fumigatus* MAT1-1-1 proteins.

| Protein construct                | Amino acid position | Theoretical <sup>a, b</sup> MW (Daltons) |
|----------------------------------|---------------------|------------------------------------------|
| GST-AfMAT1-1-1 <sup>c</sup>      | 1-368               | 40,800                                   |
| GST-AfMAT1-1-1 <sub>1-197</sub>  | 1-197               | 22,300                                   |
| GST-AfMAT1-1-1 <sub>78-197</sub> | 78-197              | 14,000                                   |
| GST-AfMAT1-1-1 <sub>78-368</sub> | 78-368              | 32,400                                   |
| GST-AfMAT1-1-1 <sub>1-235</sub>  | 1-235               | 26,300                                   |
| GST-AfMAT1-1-1 <sub>78-235</sub> | 78-235              | 18,000                                   |
| GST-AfMAT1-1-1 <sub>1-254</sub>  | 1-254               | 28,300                                   |
| GST-AfMAT1-1-1 <sub>78-254</sub> | 78-254              | 20,000                                   |

<sup>a</sup> the theoretical molecular weight predicted by ProtParam tool (Gasteiger *et al.* 2005).

<sup>b</sup> MWs of the proteins without N-terminal GST-tag (26,000 Da).

<sup>c</sup>full-length AfMAT1-1-1.

## Supplemental figures:

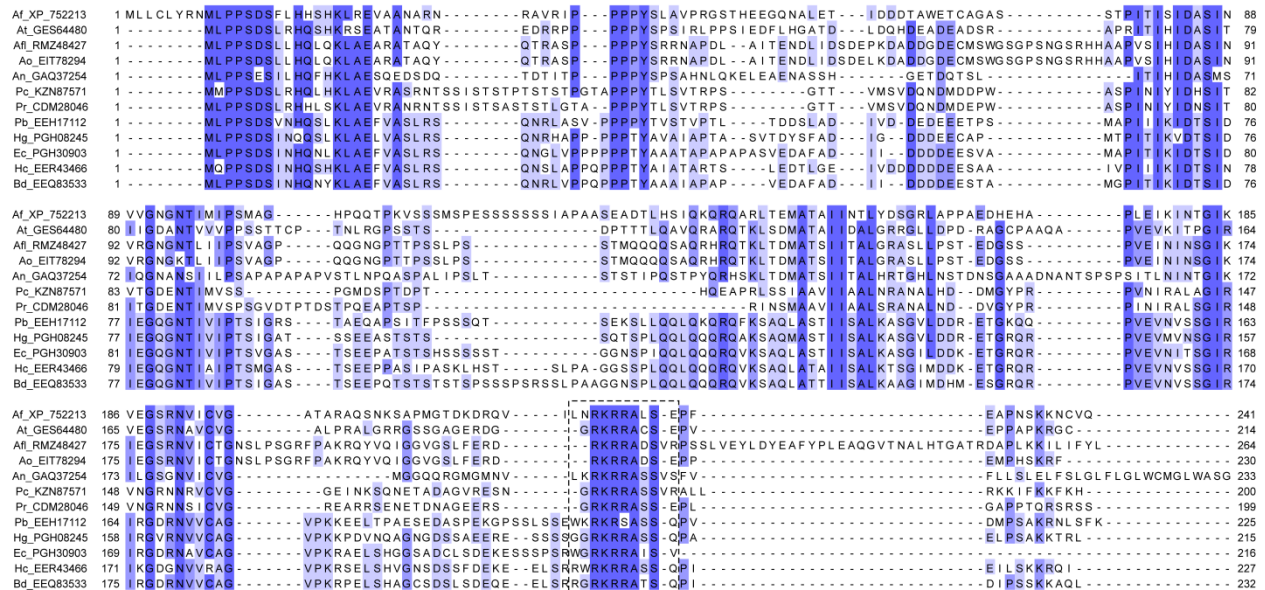

**Figure S1. Multiple alignments of TomA orthologs.** The *tomA* gene is found exclusively in the subclass of Eurotiomycetes, Eurotiomycetidae. The amino acid sequence of TomA from *A. fumigatus* (Af\_XP\_752213) was aligned with identified orthologs *Aspergillus terreus* (At\_GES64480), *Aspergillus flavus* (Afl\_RMZ48427); *Aspergillus oryzae* (Ao\_EIT78294); *Aspergillus niger* (An\_GAQ37254); *Penicillium chrysogenum* (Pc\_KZN87571); *Penicillium roqueforti* (Pr\_CDM28046); *Paracoccidioides brasiliensis* (Pb\_EEH17112); *Helicocarpus griseus* (Hg\_PGH08245); *Emmonsia crescens* (Ec\_PGH30903); *Histoplasma capsulatum* (Hc\_EER43466); *Blastomyces dermatitidis* (Bd\_EEQ83533). Identical and conserved residues are shaded in dark blue and light blue, respectively. Potential nuclear localization site (NLS) (dashed rectangle) was predicted using cNLS Mapper (Kosugi *et al.* 2009).

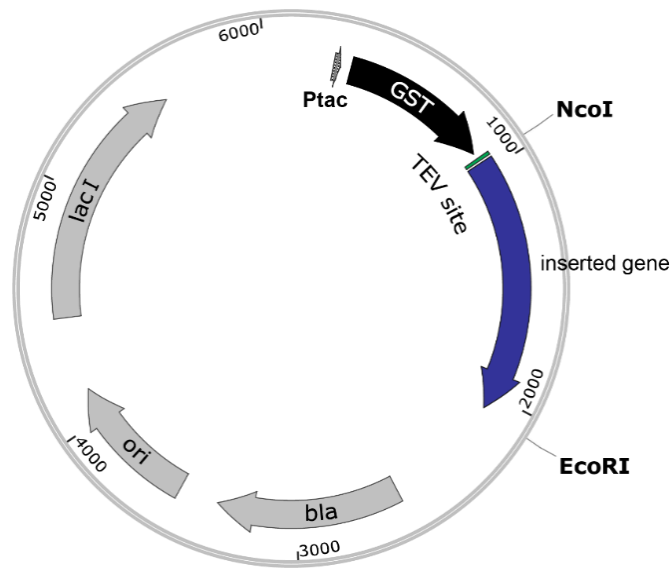

**Figure S2. Schematic diagram of the pGEX-4T-1-TEV bacterial expression vector.** The pGEX-4T-1-TEV vector was used for protein expression of the GST-AfMAT1-1-1 and its truncated derivatives. The expression of inserted gene versions was controlled by the inducible *tac* promoter (*Ptac*). GST-tag, indicated in black, may be cleaved off at the tobacco etch virus (TEV) protease recognition site, shown in green. Truncated *AfMAT1-1-1* gene versions were inserted at the indicated position.

M E A A I S P L E R A F N T F L M T M P P E Q L E E L L Q Y L Q D  
ATG GAA GCT GCA ATC TCT CCC CTC GAG CGT GCT TTC AAC ACC TTT TTG ATG ACC ATG CCA CCA GAG CAG CTG GAG GAG CTT CTG CAG TAC CTC CAA GAC  
T K A Q E N N G L Q L P N A T P A T T A N N A L D N H H G A A V P  
ACC AAA GCC CAG GAA AAC AAT GGT CTG CAG CTC CCA AAT GCA ACT CCT GCC ACT ACT GCA AAC AAC GTC TTG GAC AAT CAT CAT G GCA GCC GTT CCA  
V A A T P R P L V T R A K R T Q E G K K R P L N S F I A F R S F Y  
GTT GCC GCA ACT CCT CGT CCC CTG GTT ACT CGT GCC AAA CGC ACC CAG GAA GGA AAG AAA AGA CCT CTT AAT AGC TTC ATC GCA TTC AGA AGC TTC TAC  
S V I F P D L T Q K A K G G I L R F L W Q N D P F K A K W A I L A  
TCT GTC ATC TTT CCT GAC CTC ACT CAA AAG GCC AAG TCG GGC ATT CTT CGC TTC TTG TGG CAG AAT GAC CCT TTC AAG GCC AAA TGG GCA ATC CTC GCG  
K A Y S I I R D D H E S E V S L D Q F L E I T A K F I G L F E P A  
AAG GCG TAC TCC ATC ATC CGC GAC GAC CAT GAA AGC GAG GTG TCT TTG GAT CAG TTC CTG GAG ATT ACT GCC AAG TTC ATC GGT CTG TTT GAA CCC GCT  
R Y L D A M G W Q L N F D D Q Q Q Y T M A K V K I T T I P E A D V  
CGC TAC CTT GAC GCG ATG GGG TGG CAG TTG AAC TTC GAT GAC CAA CAG CAA TAC ACA ATG GCT AAG GTC AAA ATC ACG ACA ATT CCT GAA GCC GAT GTT  
S T N Y S V G D I V K H C Y D T G Y V S E K P G K H T G S N G N N  
TCT ACC AAT TAC TCG GTT GGC GAT ATC GTG AAA CAT TGC TAT GAT ACT GGC TAC GTG TCT GAG AAA CCA GGC AAG CAC ACC GGA AGT AAT GGC AAC AAT  
T S T M A F A A Q P T F V V K A E N G I Q I T G D D A I V T D D A  
ACT TCC ACA ATG GCC TTC GCT GCT CAA CCG ACT TTT GTT GTC AAA GCA GAG AAC GGC ATT CAG ATC ACT GGC GAC GAT GCC ATT GTG ACT GAC GAT GCC  
F A T P E V D F P T P E E T D G T Q T P N P V E A E P V V N N H P  
TTC GCA ACT CCT GAA GTG GAT TTT CCA ACT CCT GAA GAG ACA GAT GGC ACT CAA ACT CCT AAT CCT GTG GAG GCA GAA CCA GTT GTC AAC AAC CAT CCT  
Y A F M D V P G V P G G Q Q L E L E L F Q G N D F D L N N M Q L P  
TAC GCT TTC ATG GAT GTG CCT GGC GTG CCT GGC GGT CAG CAG CTT GAA CTT GAA TTG TTC CAG GGC AAT GAC TTC GAT CTC AAC AAC ATG CAA CTC CCA  
I I D A L P F D L A V A D A F P L N Y D P L E E P P F G A F D I D  
ATT ATC GAC GCC TTG CCC TTT GAT CTA GCT GTC GCA GAT GCA TTT CCA CTG AAC TAT GAC CCA CTG GAA GAA CCT CCT TTT GGA GCC TTT GAC ATT GAT  
Q Y I N V stop  
CAA TAC ATC AAC GTC TGA

**Figure S3. Distribution of rare (orange) and highly rare codons (red) in the coding sequence of *AfMAT1-1-1*.** The codon optimization tool, freely available online (Daniel *et al.* 2015) was used to identify codons that are rarely used by *E. coli*. The *E. coli* strain B codon usage table was acquired from the codon usage database: <https://www.kazusa.or.jp/codon/>.

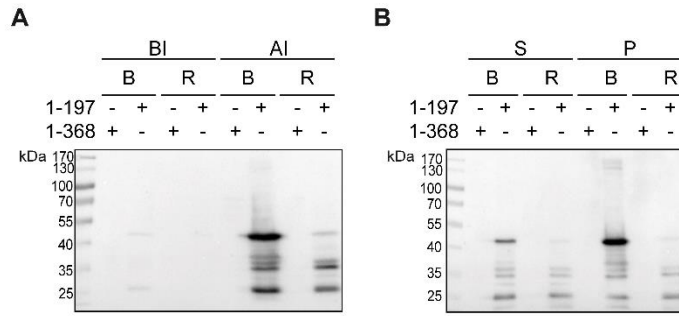

**Figure S4. SDS-PAGE analysis of full-length GST-AfMAT1-1-1 and shortened variant GST-AfMAT1-1-1<sub>1-197</sub> expression in *E. coli*.** (A) *E. coli* BL21 pLysS (B) and Rosetta (R) cells expressing GST-tagged full-length GST-AfMAT1-1-1 (1-368) and GST-AfMAT1-1-1<sub>1-197</sub> (1-197) were induced (AI) as described in Materials and Methods section. Protein fractions from uninduced cells (BI) are shown. (B) Cell lysate fractions supernatant (S) and pellet (P) were examined for GST-AfMAT1-1-1 (1-368) and GST-AfMAT1-1-1<sub>1-197</sub> (1-197) protein yields in *E. coli* BL21 pLysS (B) and Rosetta (R) cells. Predicted MW for GST-AfMAT1-1-1 (1-368) and GST-AfMAT1-1-1<sub>1-197</sub> (1-197) are 66.8 and 48.3 kDa, respectively.

A

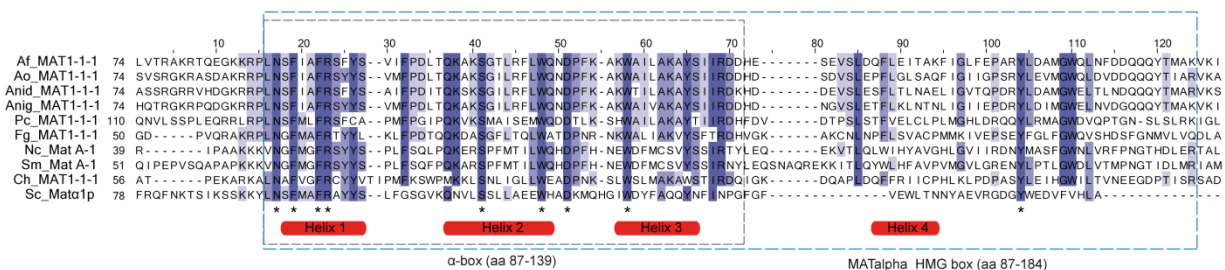

B

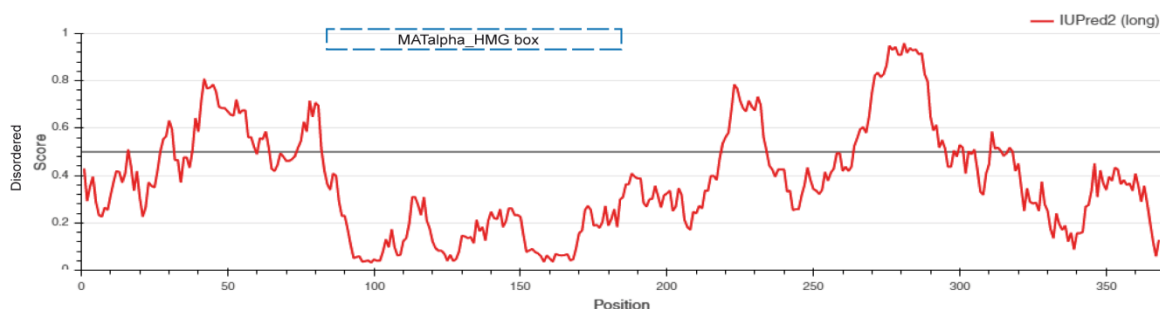

**Figure S5. Multiple sequence alignment of selected alpha-box domains from representative species of Ascomycota. (A)** The sequences of MAT1-1-1 proteins from *Aspergillus fumigatus* (Af, AAXB3123), *Aspergillus oryzae* (Ao, XP\_001824461), *Aspergillus nidulans* (Anid, XP\_660359), *Aspergillus niger* (Anig, XP\_001394976), *Penicillium chrysogenum* (Pc, KZN86912), *Fusarium graminearum* (Fg, CEF77353), *Neurospora crassa* (Nc, P19392), *Sordaria macrospora* (Sm, KAA8630680), *Cochliobolus heterostrophus* (Ch, Q02990), *Saccharomyces cerevisiae* (Sc, ONH75384) were retrieved from the National Center for Biotechnology Information (NCBI) database. The *A. fumigatus* sequence was used as a template in a NCBI-BLASTP suite (Camacho *et al.* 2009). Conserved alpha-box domain (~55 amino acids) is indicated by the black dashed rectangle and the domain; as defined in the PFAM database (PF04769) MATalpha\_HMG box, is indicated by the dashed blue rectangle. Conserved residues are highlighted in blue, and the fully conserved residues are marked by an asterisk (\*) under the alignment. The numbering indicates the amino acid position relative to the N-terminus in each predicted protein. Secondary structure elements, predicted by Jpred server (Drozdetskiy *et al.* 2015) are shown under the alignment. **(B)** Disorder of full-length AfMAT1-1-1 as predicted by the IUPred2A server (Mészáros *et al.* 2018). Residues above threshold 0.5 are considered disordered. The position of the MATalpha\_HMG box domain is indicated.

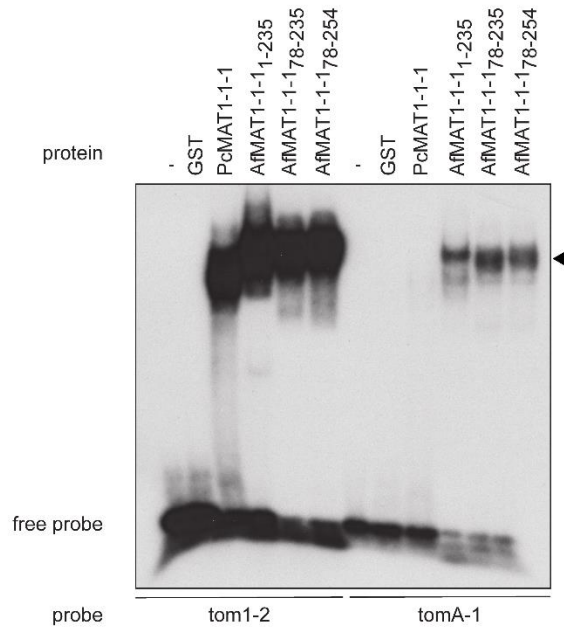

**Figure S6. Binding of various shortened variants of AfMAT1-1-1 to the tom1-2 and tomA-1 dsDNA probes.** 10  $\mu$ g of each purified variant of AfMAT1-1-1: AfMAT1-1-1<sub>1-235</sub>, AfMAT1-1-1<sub>78-235</sub>, and AfMAT1-1-1<sub>78-254</sub> were incubated with radiolabeled DNA probes originating from *tom1* promoter from *P. chrysogenum* (tom1-2) and *tomA* promoter from *A. fumigatus* (tomA-1). The lanes are labeled as follows: “–”, dsDNA probe without protein; “GST”, GST protein; “AfMAT1-1-1<sub>1-235</sub>”, GST-tagged AfMAT1-1-1<sub>1-235</sub>; “AfMAT1-1-1<sub>78-235</sub>”, GST-tagged AfMAT1-1-1<sub>78-235</sub>; “AfMAT1-1-1<sub>78-254</sub>”, GST-tagged AfMAT1-1-1<sub>78-254</sub>. Black arrow head indicates formation of the protein-DNA complexes.

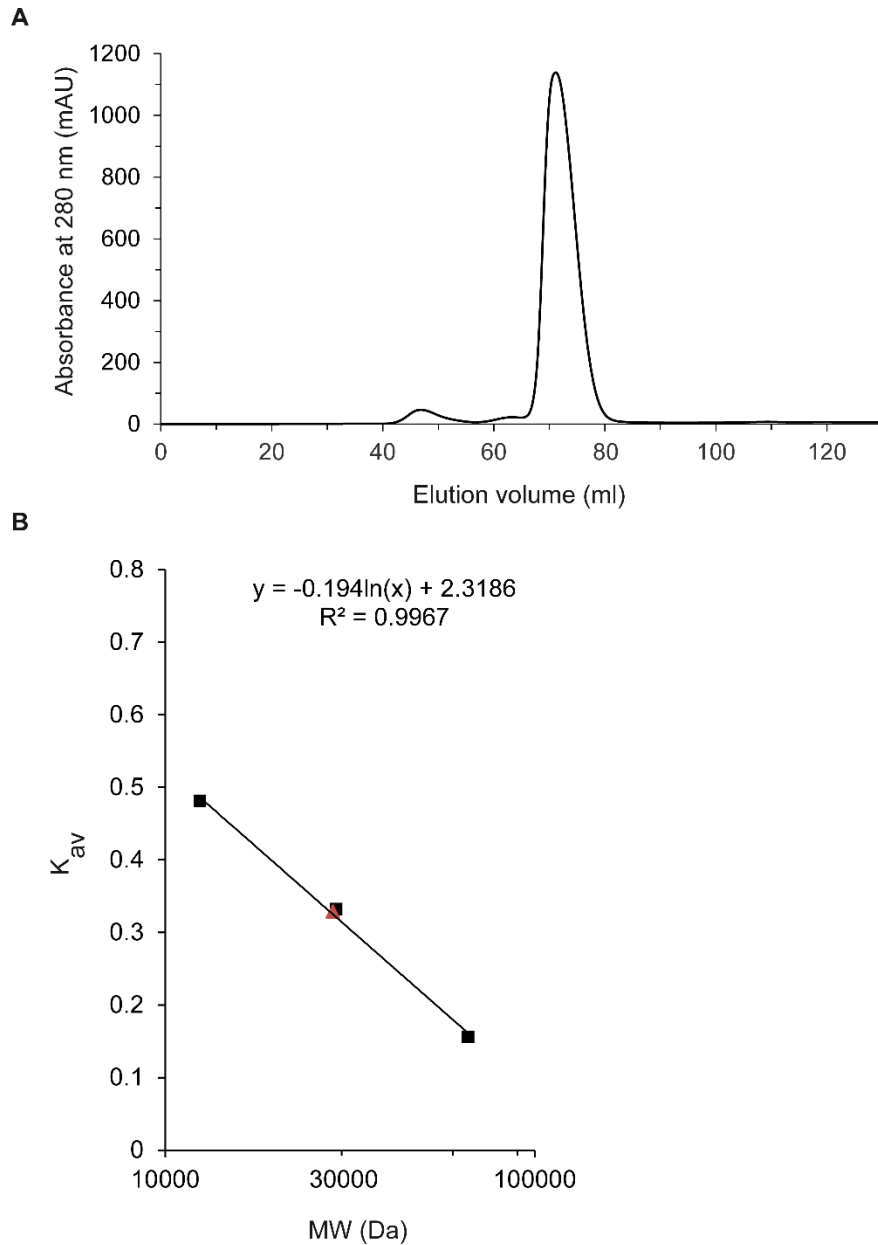

**Figure S7. Size-exclusion chromatography (SEC) elution profile of AfMAT1-1-1<sub>78-235</sub>.** (A) Eluate fractions containing pure AfMAT1-1-1<sub>78-235</sub> (Figure 3E) were pooled together concentrated and loaded on the Superdex 75 HiLoad 16/600 *prep grade* column. The SEC chromatogram shows that AfMAT1-1-1<sub>78-235</sub> eluted at the volume of 71.1 ml. (B) Calibration curve of the Superdex 75 HiLoad 16/600 *prep grade* column using following molecular weight (MW) protein standards: albumin (66 kDa), carbonic anhydrase (29 kDa) and cytochrome C (12.4 kDa). The corresponding elution volume of AfMAT1-1-1<sub>78-235</sub> is indicated in red. The theoretical MW for AfMAT1-1-1<sub>78-235</sub> is 18 kDa. Based on the calibration curve, the estimated MW for AfMAT1-1-1<sub>78-235</sub> is 28.4 kDa, indicating that AfMAT1-1-1<sub>78-235</sub> most likely forms a dimer.



## References

- Becker K., C. Beer, M. Freitag, and U. Kück, 2015 Genome-wide identification of target genes of a mating-type  $\alpha$ -domain transcription factor reveals functions beyond sexual development. *Mol. Microbiol.* 96: 1002–1022.  
<https://doi.org/10.1111/mmi.12987>
- Camacho C., G. Coulouris, V. Avagyan, N. Ma, J. Papadopoulos, *et al.*, 2009 BLAST+: architecture and applications. *BMC Bioinformatics* 10: 421.  
<https://doi.org/10.1186/1471-2105-10-421>
- Daniel E., G. U. Onwukwe, R. K. Wierenga, S. E. Quaggin, S. J. Vainio, *et al.*, 2015 ATGme: Open-source web application for rare codon identification and custom DNA sequence optimization. *BMC Bioinformatics* 16: 303.  
<https://doi.org/10.1186/s12859-015-0743-5>
- Drozdetskiy A., C. Cole, J. Procter, and G. J. Barton, 2015 JPred4: a protein secondary structure prediction server. *Nucleic Acids Res.* 43: W389–W394.  
<https://doi.org/10.1093/nar/gkv332>
- Gasteiger E., C. Hoogland, A. Gattiker, S. Duvaud, M. R. Wilkins, *et al.*, 2005 *Protein Analysis Tools on the ExPASy Server* 571–571 *From: The Proteomics Protocols Handbook Protein Identification and Analysis Tools on the ExPASy Server.*
- Kosugi S., M. Hasebe, M. Tomita, and H. Yanagawa, 2009 Systematic identification of cell cycle-dependent yeast nucleocytoplasmic shuttling proteins by prediction of composite motifs. *Proc. Natl. Acad. Sci. U. S. A.* 106: 10171–10176.  
<https://doi.org/10.1073/pnas.0900604106>
- Mészáros B., G. Erdős, and Z. Dosztányi, 2018 IUPred2A: context-dependent prediction of protein disorder as a function of redox state and protein binding. *Nucleic Acids Res.* 46: W329–W337. <https://doi.org/10.1093/nar/gky384>
